# Supplementary material for: The unfavorable effects of COVID‐19 on Dutch advanced melanoma care
Source: PubMed Central journal article supplement — Int J Cancer. 2021 Oct 22;150(5):816–24. doi: 10.1002/ijc.33833 (PMC8652896; doi:10.1002/ijc.33833), 2021-10-22
Supplement: IJC-150-816-s001.pdf [file IJC-150-816-s001.pdf]

# The unfavorable effects of COVID-19 on Dutch advanced melanoma care

Olivier J. Van Not MD, Jesper van Breeschoten PharmD, Alfonsus J.M. van den Eertwegh MD, PhD, Doranne L. Hilarius PharmD, PhD, Melissa M. De Meza MD, John B. Haanen MD, PhD, Christian U. Blank MD, PhD, Maureen J.B. Aarts MD, PhD, Franchette W.P.J. van den Berkmortel MD, PhD, Jan Willem B. de Groot MD, PhD, Geke A.P. Hospers MD, Ph, Rawa K. Ismail PharmD, Ellen Kapiteijn MD, PhD, Djura Piersma MD, PhD, Rozemarijn S. van Rijn MD, PhD, Marion A.M. Stevense-den Boer MD, PhD, Astrid A.M. van der Veldt MD, PhD, Gerard Vreugdenhil MD, PhD, Marye J. Boers-Sonderen MD, PhD, Willeke A.M. Blokx MD, PhD, Karijn P.M. Suijkerbuijk MD, PhD and Michel W.J.M. Wouters MD, PhD

## Table of contents

|                                                            |   |
|------------------------------------------------------------|---|
| Supplementary tables .....                                 | 2 |
| Supplement I – Baseline characteristics first wave .....   | 2 |
| Supplement II – Baseline characteristics second wave ..... | 3 |
| Supplement III – Baseline characteristics (regions).....   | 4 |

## Supplementary tables

### Supplement I – Baseline characteristics first wave

Comparison of baseline characteristics of patients diagnosed during the first wave (March 16<sup>th</sup> 2020 until May 24<sup>th</sup> 2020) vs. the control period (March 16<sup>th</sup> 2018 until May 24<sup>th</sup> 2018 and March 16<sup>th</sup> 2019 until May 24<sup>th</sup> 2019).

| Baseline variable                    |                       | First wave<br>(N = 108) | Control period<br>(N = 339) | P-value |
|--------------------------------------|-----------------------|-------------------------|-----------------------------|---------|
| Age, median (range)                  |                       | 69 (36-94)              | 68 (21-92)                  | 0.599   |
| Gender                               | Male                  | 60 (55.6)               | 199 (58.7)                  | 0.642   |
|                                      | Female                | 48 (44.4)               | 140 (41.3)                  |         |
| ECOG PS                              | 0-1                   | 79 (82.3)               | 259 (85.5)                  | 0.553   |
|                                      | ≥2                    | 17 (17.7)               | 44 (14.5)                   |         |
| LDH                                  | Not determined/normal | 54 (54.0)               | 195 (60.9)                  | 0.427   |
|                                      | 250-500U/L            | 29 (29.0)               | 83 (25.9)                   |         |
|                                      | >500 U/L              | 17 (17.0)               | 42 (13.1)                   |         |
| Stage (8 <sup>th</sup> edition AJCC) | Unresectable IIIc     | 13 (12.3)               | 34 (10.1)                   | 0.900   |
|                                      | IV-M1a                | 8 (7.5)                 | 31 (9.2)                    |         |
|                                      | IV-M1b                | 11 (10.4)               | 38 (11.3)                   |         |
|                                      | IV-M1c                | 39 (36.8)               | 133 (39.5)                  |         |
|                                      | IV-M1d                | 35 (33.0)               | 101 (30.0)                  |         |
| Brain metastases                     | No                    | 68 (66.0)               | 225 (69.0)                  | 0.839   |
|                                      | Yes, asymptomatic     | 13 (12.6)               | 36 (11.0)                   |         |
|                                      | Yes, symptomatic      | 22 (21.4)               | 65 (19.9)                   |         |
| Liver metastases                     | No                    | 74 (70.5)               | 244 (73.5)                  | 0.631   |
|                                      | Yes                   | 31 (29.5)               | 88 (26.5)                   |         |
| Organ sites                          | 0-2                   | 64 (59.3)               | 200 (59.0)                  | 1.000   |
|                                      | ≥3                    | 44 (40.7)               | 139 (41.0)                  |         |
| BRAF <sup>V600</sup> -mutation       | Wild-type             | 66 (61.1)               | 179 (52.8)                  | 0.162   |
|                                      | Mutant                | 42 (38.9)               | 160 (47.2)                  |         |
| Region                               | North                 | 15 (13.9)               | 74 (21.8)                   | 0.175   |
|                                      | Middle                | 65 (60.2)               | 178 (52.5)                  |         |
|                                      | South                 | 28 (25.9)               | 87 (25.7)                   |         |

## Supplement II – Baseline characteristics second wave

Comparison of baseline characteristics of patients diagnosed during the second wave (September 21<sup>st</sup> 2020 until December 27<sup>th</sup> 2020) vs. the control period (September 21<sup>st</sup> 2018 until December 27<sup>th</sup> 2018 and September 21<sup>st</sup> 2019 until December 27<sup>th</sup> 2019).

| Baseline variable                    |                       | Second wave<br>(N = 166) | Control period<br>(N = 455) | P-value |
|--------------------------------------|-----------------------|--------------------------|-----------------------------|---------|
| Age, median (range)                  |                       | 68 (27-91)               | 66 (24-92)                  | 0.215   |
| Gender                               | Male                  | 97 (58.4)                | 269 (59.1)                  | 0.951   |
|                                      | Female                | 69 (41.6)                | 186 (40.9)                  |         |
| ECOG PS                              | 0-1                   | 109 (72.2)               | 351 (84.4)                  | 0.002   |
|                                      | ≥2                    | 42 (27.8)                | 65 (15.6)                   |         |
| LDH                                  | Not determined/normal | 77 (50.0)                | 255 (59.7)                  | 0.091   |
|                                      | 250-500U/L            | 48 (31.2)                | 100 (23.4)                  |         |
|                                      | >500 U/L              | 29 (18.8)                | 72 (16.9)                   |         |
| Stage (8 <sup>th</sup> edition AJCC) | Unresectable IIIc     | 9 (5.5)                  | 49 (10.8)                   | 0.001   |
|                                      | IV-M1a                | 5 (3.1)                  | 36 (8.0)                    |         |
|                                      | IV-M1b                | 24 (14.7)                | 44 (9.7)                    |         |
|                                      | IV-M1c                | 59 (36.2)                | 196 (43.4)                  |         |
|                                      | IV-M1d                | 66 (40.5)                | 127 (28.1)                  |         |
| Brain metastases                     | No                    | 94 (58.8)                | 309 (70.9)                  | 0.016   |
|                                      | Yes, asymptomatic     | 29 (18.1)                | 62 (14.2)                   |         |
|                                      | Yes, symptomatic      | 37 (23.1)                | 65 (14.9)                   |         |
| Liver metastases                     | No                    | 103 (64.0)               | 313 (69.7)                  | 0.214   |
|                                      | Yes                   | 58 (36.0)                | 136 (30.3)                  |         |
| Organ sites                          | 0-2                   | 94 (56.6)                | 258 (56.7)                  | 1.000   |
|                                      | ≥3                    | 72 (43.4)                | 197 (43.3)                  |         |
| BRAF <sup>V600</sup> -mutation       | Wild-type             | 87 (52.4)                | 221 (48.6)                  | 0.450   |
|                                      | Mutant                | 79 (47.6)                | 234 (51.4)                  |         |
| Region                               | North                 | 33 (19.9)                | 90 (19.8)                   | 0.794   |
|                                      | Middle                | 102 (61.4)               | 266 (58.5)                  |         |
|                                      | South                 | 31 (18.7)                | 98 (21.5)                   |         |

### Supplement III – Baseline characteristics (regions)

Comparison of baseline characteristics of patients diagnosed in the three different regions defined in this study during the first wave.

| Baseline variable                    |                       | North<br>(N = 15) | Middle<br>(N = 65) | South<br>(N = 28) | P-value |
|--------------------------------------|-----------------------|-------------------|--------------------|-------------------|---------|
| Age, median (range)                  |                       | 72 (45-87)        | 69 (36-94)         | 65.5 (40-91)      | 0.472   |
| Gender                               | Male                  | 9 (60.0)          | 36 (55.4)          | 15 (53.6)         | 0.921   |
|                                      | Female                | 6 (40.0)          | 29 (44.6)          | 13 (46.4)         |         |
| ECOG PS                              | 0-1                   | 12 (85.7)         | 49 (81.7)          | 18 (81.8)         | 0.936   |
|                                      | ≥2                    | 2 (14.3)          | 11 (18.3)          | 4 (18.2)          |         |
| LDH                                  | Not determined/normal | 8 (61.5)          | 35 (57.4)          | 11 (42.3)         | 0.305   |
|                                      | 250-500U/L            | 5 (38.5)          | 15 (24.6)          | 9 (34.6)          |         |
|                                      | >500 U/L              | 0 (0.0)           | 11 (18.0)          | 6 (23.1)          |         |
| Stage (8 <sup>th</sup> edition AJCC) | Unresectable IIIc     | 2 (13.3)          | 9 (14.3)           | 2 (7.1)           | 0.278   |
|                                      | IV-M1a                | 3 (20.0)          | 4 (6.3)            | 1 (3.6)           |         |
|                                      | IV-M1b                | 1 (6.7)           | 4 (6.3)            | 6 (21.4)          |         |
|                                      | IV-M1c                | 4 (26.7)          | 24 (38.1)          | 11 (39.3)         |         |
|                                      | IV-M1d                | 5 (33.3)          | 22 (34.9)          | 8 (28.6)          |         |
| Brain metastases                     | No                    | 10 (66.7)         | 40 (64.5)          | 18 (69.2)         | 0.995   |
|                                      | Yes, asymptomatic     | 2 (13.3)          | 8 (12.9)           | 3 (11.5)          |         |
|                                      | Yes, symptomatic      | 3 (20.0)          | 14 (22.6)          | 5 (19.2)          |         |
| Liver metastases                     | No                    | 12 (80.0)         | 44 (71.0)          | 18 (64.3)         | 0.555   |
|                                      | Yes                   | 3 (20.0)          | 18 (29.0)          | 10 (35.7)         |         |
| Organ sites                          | 0-2                   | 9 (60.0)          | 40 (61.5)          | 15 (53.6)         | 0.772   |
|                                      | ≥3                    | 6 (40.0)          | 25 (38.5)          | 13 (46.4)         |         |
| BRAF <sup>V600</sup> -mutation       | Wild-type             | 10 (66.7)         | 39 (60.0)          | 17 (60.7)         | 0.891   |
|                                      | Mutant                | 5 (33.3)          | 26 (40.0)          | 11 (39.3)         |         |
